# Supplementary material
Source: publisher site journal article supplement (https://www.dovepress.com/article/568131)
Supplement: Supplementary file 1 [file 568131%20supplementary.pdf]

**Supplementary Figure S1.** Study schedule, dose titration, and assessment time-points (T0–T3)

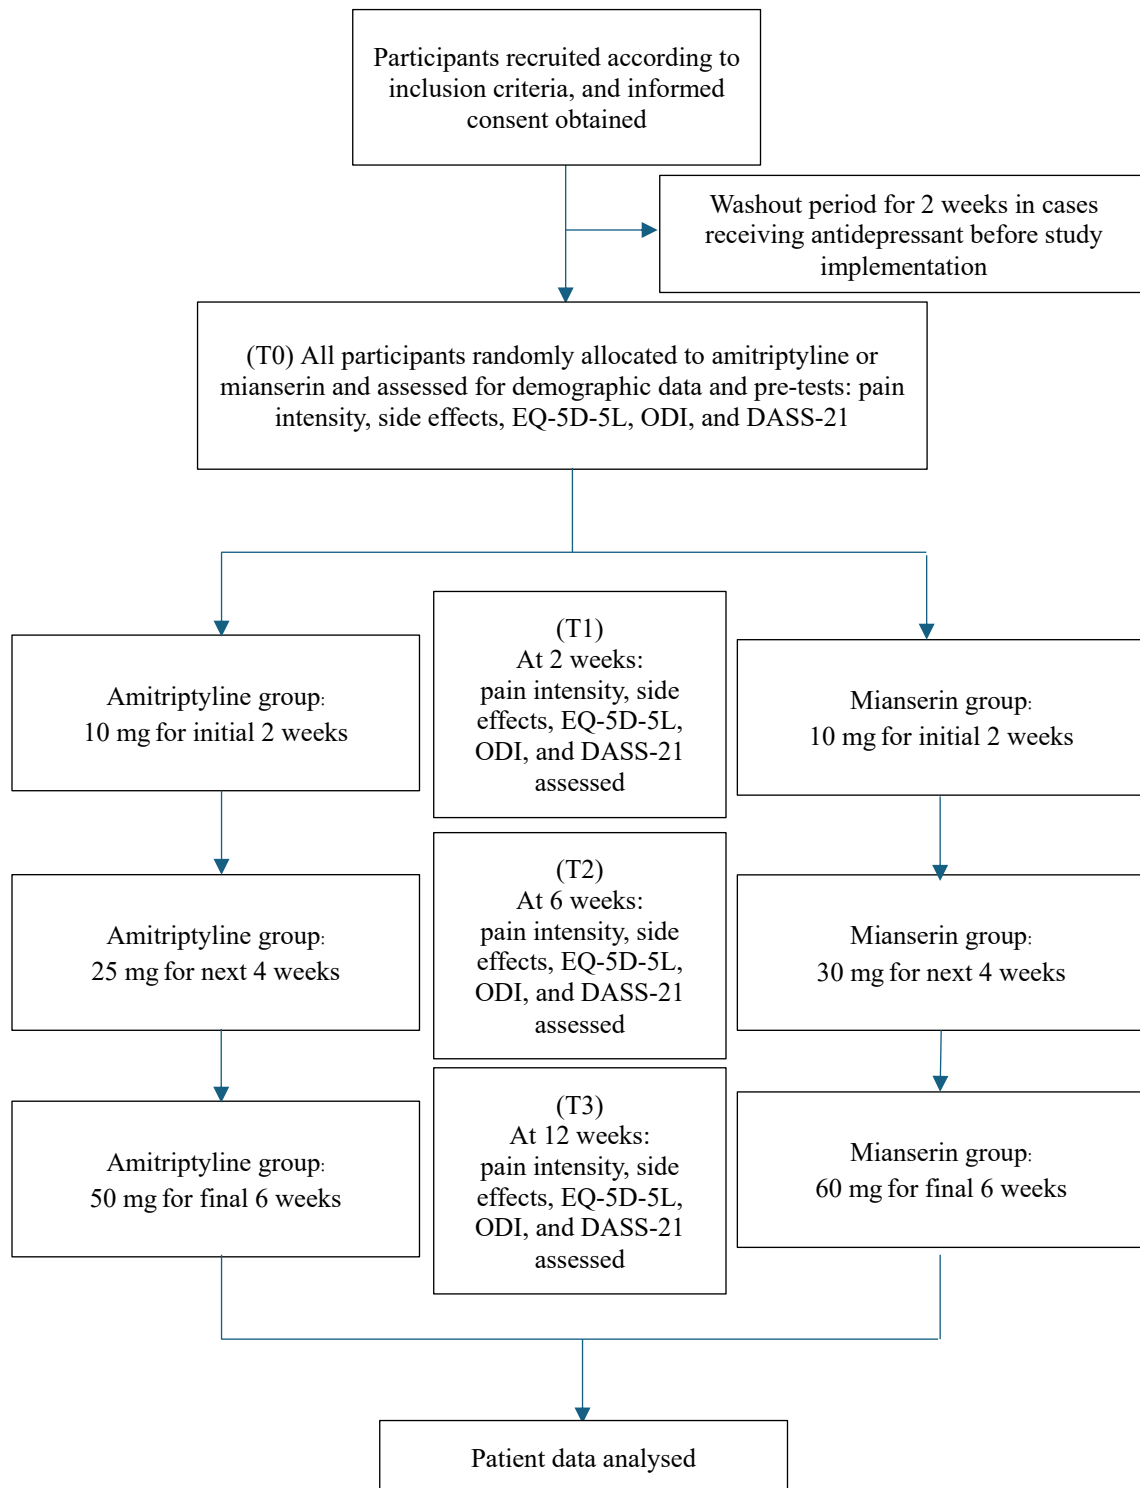

**Abbreviations:** DASS-21, Depression, Anxiety and Stress Scale–21 Items; EQ-5D-5L, EuroQol 5 Dimensions 5 Levels; ODI, Oswestry Disability Index; T0, baseline; T1, week 2; T2, week 6; T3, week 12
